# Supplementary material for: Sleep duration has a limited impact on the prevalence of menstrual irregularities in athletes: a cross-sectional study
Source: PeerJ. 2024 Feb 16;12:e16976. doi: 10.7717/peerj.16976 (PMC10875987; doi:10.7717/peerj.16976)
Supplement: Supplemental Information 3 — Menstruation Questionnaire. [file peerj-12-16976-s003.xlsx]

## Sheet: Sheet2
	Menstruation Questionnaire
		Name			Birthday	y/m/d (age) / / ( )
		Instructions: Read the sentences below and cirble the word that best describes your current situation
		(1) What is the length of your menstrual cycle? Please check the appropriate box for the following three options.
					1. Regularly, once a month
					2. Intermittently regular
					3. Missing for more than 3 months
		(2) Individuals who selected "Reegularly, once a month" earlier
		What is its average length of your cycle in days?				Approx.（ ）days
		(3) Please indicate if you recall the starting dates of your last three menstrual periods
		Date of your most recent menstrual period starting a)					Around /
		Date of the menstrual period onset prior the most recent one b)					Around /
		Also, the starting date of the mestrual period before (b) c)					Around /
		(4) What has been your average sleep duration over the past month?
				Approx. ( ) hours/day
